# Supplementary material for: ILB® Attenuates Clinical Symptoms and Serum Biomarkers of Oxidative/Nitrosative Stress and Mitochondrial Dysfunction in Patients with Amyotrophic Lateral Sclerosis
Source: MDPI journal article supplement (doi:10.3390/jpm11080794), 2021-08-14
Supplement: s1 [file s1]

**Table S1.** Clinical trial protocol

|                                                                                                                                                                                                                                                                                                                                                                                                                                                                                                                                   |                                                      |
|-----------------------------------------------------------------------------------------------------------------------------------------------------------------------------------------------------------------------------------------------------------------------------------------------------------------------------------------------------------------------------------------------------------------------------------------------------------------------------------------------------------------------------------|------------------------------------------------------|
| <b>Study Title</b><br><br>A single-centre, open single-arm study where the safety, tolerability and efficacy of subcutaneously administered ILB® will be evaluated in patients with Amyotrophic Lateral Sclerosis                                                                                                                                                                                                                                                                                                                 |                                                      |
| <b>Study code</b><br><br>TM-105                                                                                                                                                                                                                                                                                                                                                                                                                                                                                                   | <b>EudraCT No</b><br><br>2017-005065-47              |
| <b>Study period</b><br><br>Estimated date of first subject enrolled: Q2 2018<br><br>Estimated date of last subject completed: Q3 2019                                                                                                                                                                                                                                                                                                                                                                                             | <b>Phase of development</b><br><br>Phase IIa - pilot |
| <b>Study design and duration</b><br><br>This was a Phase IIa single-centre, open single-arm study in patients with Amyotrophic Lateral Sclerosis.<br><br>Eligible subjects were administered weekly doses of 1 mg/kg ILB®. A total of 5 subcutaneous (s.c.) doses at the study clinic. The study consisted of 10 visits; One 2-part screening visit, 5 IMP administration visits, and 3 follow-up visits. Each individual patient's study participation was approximately 4 months, including the screening and follow-up visits. |                                                      |
| <b>Number of patients planned:</b><br><br>15 patients                                                                                                                                                                                                                                                                                                                                                                                                                                                                             |                                                      |
| <b>Objectives and endpoints</b><br><br><i>Primary objective:</i><br><br>The primary objective of the study was to evaluate the safety and tolerability of ILB® in patients diagnosed with ALS.<br><br><i>Primary endpoints:</i><br><br>Frequency, seriousness and intensity of Treatment-emergent Adverse Events (TEAEs)<br><br>Physical examination<br><br>Vital signs<br><br>Electrocardiogram (ECG) recordings                                                                                                                 |                                                      |

Safety laboratory measurements: clinical chemistry, haematology including activated partial thromboplastin time (APTT)

*Secondary objective:*

The secondary objective of the study was to evaluate efficacy of ILB® in patients diagnosed with ALS.

*Secondary endpoints:*

Functional rating with ALS Functional Rating Scale – Revised (ALSFRS-R)

Functional rating with Norris scale

Evaluation of ALS biomarker Neurofilament Light chain (NFL)

Evaluation of biomarkers for neurological disorders (see 11.4.2)

Pulmonary function (FVC)

Quality of Life (QoL)

Autonomous symptoms

Levels of Hepatocyte Growth Factor (HGF)

Pharmacokinetic measurements of ILB® in plasma

Changes in APTT (effect APTT)

*Exploratory objectives:*

To evaluate the effect of ILB® on levels of *e.g.* growth factors, cytokines and biomarkers in plasma and cerebrospinal fluid (CSF).

**Safety and efficacy assessments**

*Safety:*

AE assessments started at administration of the first dose of ILB®.

A physical exam was obtained at all visits. On the days of ILB® administration (Visit 2 to Visit 6), physical examination was obtained before dosing.

Vital signs (blood pressure, heart rate and body temperature) were obtained at all visits.

12-lead ECG were obtained at Visit 1 and Visit 7.

Lab tests (clinical chemistry, haematology, haemostasis) were obtained at all visits. On the days of ILB® administration (Visit 2 to Visit 6), lab tests were obtained before dosing.

*Efficacy:*

The clinical investigator completed the ALS Functional Rating Scale - Revised (ALSFRS-R) at all visits. On the days of ILB® administration, rating scales were completed before dosing.

The clinical investigator completed the Norris functional rating scales at all visits. On the days of ILB® administration, rating scales were completed before dosing.

Blood and cerebrospinal fluid (CSF) samples for evaluation of the ALS biomarker Neurofilament Light chain (NFL) were obtained at Visit 1 after eligibility was confirmed and at Visit 7.

Blood and CSF samples for analysis of biomarkers for neurological disorders were obtained at Visit 1 after eligibility is confirmed and at Visit 7.

Respiratory function (FVC) was evaluated at all visits. On the days of ILB® administration (Visit 2 to Visit 6), respiratory function was assessed before dosing.

Quality of Life (QoL) was evaluated using Visual Analogue Scale (VAS)-based questionnaire filled out by patient and, if applicable, a next of kin, at Visit 1, Visit 2, Visit 4, Visit 6 and Visit 8.

Autonomous symptoms were evaluated according to a 4-grade scale for a range of parameters at all visits.

Levels of Hepatocyte Growth Factor (HGF), pharmacokinetic measurements and effect APTT were obtained in conjunction with the first and last ILB® administration (Visit 2 and Visit 6). Blood samples were obtained pre-dose, 30 minutes and 1, 2, 2.5, 3, 4, 6 hours after dosing.

### **Eligibility criteria**

#### *Inclusion criteria:*

Willing and able to give written informed consent for participation in the study.

Clinical diagnosis of Amyotrophic Lateral Sclerosis.

Male or female patients between 18 to 80 years of age (inclusive).

Forced Vital Capacity (FVC)  $\geq$  65% of predicted value for gender, height and age at screening.

Evaluated with ALSFRS-R and Norris clinical rating scales for at least the past 4 weeks before study drug administration.

#### *Exclusion criteria:*

Unable to understand information about the study or are expected not to collaborate with the study team.

Concurrent serious disease, other than ALS, at the discretion of the Investigator.

Pregnancy.

Patients of child-bearing potential not willing to use adequate double contraception with < 1% failure rate after the screening visit until the last visit.

Addiction to drugs or alcohol.

Confirmed HIV, Hepatitis B or C.

Known bleeding disorders or abnormal bleeding events.

Treatment with anticoagulant drugs warfarin and novel oral anticoagulants (NOAC) within the last 14 days prior to screening.

Treatment with Riluzole or Lamotrigine within the last 28 days prior to study drug administration.

Hypersensitivity to dextran sulfate.

Poor venous access.

Patients with clinically significant abnormal PK-INR, fibrinogen, von Willebrand factor and activated partial thromboplastin time (APTT) at screening.

#### **Investigational Medicinal Product (IMP), dosage and mode of administration**

The active pharmaceutical ingredient of the IMP was a LMW-DS, named ILB®, that has a mean molecular weight of 5 kDa with 20% sulphation. ILB® is a unique and distinct LMW-DS formulation whose structure, formulation, synthesis and structure has been previously described in detail in a published patent document (publication number: WO 2016/076780 – New dextran sulphate). ILB® was provided by Tikomed AB in 10 mL vials containing a solution of 20 mg/mL ILB® in 9 mg/mL NaCl. A single batch of drug was used throughout the study (batch #8059701).

ILB® was injected subcutaneously on alternating sides of the abdomen. Five injections of 1 mg/kg, with a weekly dosing interval, were administered. The exact dose administered depended on the patient's body weight at Visit 2 (Day 1), prior to the first ILB® administration.

#### **Statistical methods**

No formal sample size calculation was performed for this study. The proposed sample size was considered sufficient in this early phase II development to provide adequate information on the patients.

Categorical data was presented as counts and percentages. Individual patient data was listed by subject number and, where applicable, assessment time.

Continuous data were summarised using descriptive statistics. The number of observations, mean, median, maximum, minimum and standard deviation were reported. Individual patient data was listed by subject number and, where applicable, assessment time.

Individual plasma concentration-time data of ILB® were evaluated using a validated Phoenix WinNonlin® software. The PK parameters were calculated by non-compartmental analysis (NCA). Descriptive statistics for the assessed PK parameters were presented for each parameter and first and last ILB® administration (Visit 2 and Visit 6), as well as pooled data over the dosing days (if appropriate).

A more technical and detailed elaboration of the principal features was presented in a separate Statistical Analysis Plan (SAP).



**Table S3.** Raw data reporting the circulating concentrations of citrulline (CITR), alanine (ALA), ornithine/citrulline ratio (ORN/CITR) detected in serum of each patient included in the study, before and after ILB® administration. Values are expressed as  $\mu\text{mol/l}$  serum. Significant differences on the Student's t-test for paired samples are marked in red. The concentrations of other amino acids and amino group-containing compounds (aspartate, glutamate, asparagine, serine, glutamine, histidine, glycine, threonine, arginine, taurine,  $\gamma$ -aminobutyrate, tyrosine, S-adenosylhomocysteine, L-cystathionine, valine, methionine, tryptophan, phenylalanine, isoleucine, leucine, ornithine, lysine) did not differ before and after treatment and were omitted from the Table for the sake of clarity.

| PATIENT ID                              | CITR   | ALA     | ORN/CITR | PATIENT ID                             | CITR   | ALA     | ORN/CITR |
|-----------------------------------------|--------|---------|----------|----------------------------------------|--------|---------|----------|
| TM - 105 SUBJ 101 EXPL SERUM B VISIT 1B | 14.082 | 412.563 | 2.399    | TM - 105 SUBJ 101 EXPL SERUM D VISIT 7 | 17.824 | 217.393 | 1.312    |
| TM - 105 SUBJ 102 EXPL SERUM D VISIT 1B | 32.910 | 428.911 | 1.312    | TM - 105 SUBJ 102 EXPL SERUM D VISIT 7 | 14.863 | 416.915 | 1.859    |
| TM - 105 SUBJ 103 EXPL SERUM A VISIT 1B | 21.110 | 432.289 | 2.101    | TM - 105 SUBJ 103 EXPL SERUM D VISIT 7 | 14.701 | 428.179 | 2.645    |
| TM - 105 SUBJ 104 EXPL SERUM A VISIT 1B | 21.239 | 484.059 | 1.854    | TM - 105 SUBJ 104 EXPL SERUM A VISIT 7 | 17.852 | 429.757 | 1.228    |
| TM - 105 SUBJ 105 EXPL SERUM B VISIT 1B | 22.373 | 562.368 | 0.560    | TM - 105 SUBJ 105 EXPL SERUM B VISIT 7 | 18.955 | 546.009 | 1.100    |
| TM - 105 SUBJ 106 EXPL SERUM A VISIT 1B | 18.152 | 403.358 | 0.523    | TM - 105 SUBJ 106 EXPL SERUM D VISIT 7 | 13.831 | 328.553 | 2.235    |
| TM - 105 SUBJ 107 EXPL SERUM A VISIT 1B | 24.141 | 273.188 | 0.391    | TM - 105 SUBJ 107 EXPL SERUM B VISIT 7 | 26.803 | 267.262 | 1.596    |
| TM - 105 SUBJ 108 EXPL SERUM B VISIT 1B | 38.921 | 466.325 | 1.249    | TM - 105 SUBJ 108 EXPL SERUM D VISIT 7 | 29.179 | 315.148 | 1.490    |
| TM - 105 SUBJ 109 EXPL SERUM A VISIT 1B | 18.214 | 405.240 | 1.798    | TM - 105 SUBJ 109 EXPL SERUM A VISIT 7 | 12.194 | 408.546 | 4.132    |
| TM - 105 SUBJ 110 EXPL SERUM A VISIT 1B | 22.540 | 346.071 | 1.908    | TM - 105 SUBJ 110 EXPL SERUM D VISIT 7 | 22.693 | 374.396 | 1.626    |
| TM - 105 SUBJ 111 EXPL SERUM A VISIT 1B | 30.164 | 399.005 | 1.535    | TM - 105 SUBJ 111 EXPL SERUM D VISIT 7 | 21.249 | 384.615 | 1.959    |
| TM - 105 SUBJ 112 EXPL SERUM A VISIT 1B | 26.660 | 598.715 | 1.777    | TM - 105 SUBJ 112 EXPL SERUM D VISIT 7 | 14.447 | 417.786 | 4.043    |
| TM - 105 SUBJ 113 EXPL SERUM B VISIT 1B | 16.194 | 365.052 | 2.396    | TM - 105 SUBJ 113 EXPL SERUM D VISIT 7 | 19.894 | 336.769 | 3.253    |
| Mean                                    | 23.592 | 429.011 | 1.523    | Mean                                   | 18.807 | 374.718 | 2.191    |
| S.D.                                    | 7.028  | 85.956  | 0.683    | S.D.                                   | 5.128  | 83.428  | 1.031    |
| Two-tailed t-test for paired samples    | 0.021  | 0.022   | 0.037    |                                        |        |         |          |

**Table S4.** Raw data reporting the circulating concentrations of the two main congeners of Vitamin E ( $\alpha$ -tocopherol and  $\gamma$ -tocopherol) detected in serum of each patient included in the study, before and after ILB® administration. Values are expressed as  $\mu\text{mol/l}$  serum. Significant differences on the Student's t-test for paired samples are marked in red. The concentrations of other fat-soluble vitamins and antioxidants (*all trans*-retinoic acid, *all trans*-retinol, coenzyme Q<sub>10</sub>, astaxanthin, phytoene, lutein, zeaxanthin, *trans*- $\beta$ -apo-8'-carotenal,  $\beta$ -cryptoxanthin, lycopene,  $\alpha$ -carotene,  $\beta$ -carotene, violaxanthin, 25-hydroxycholecalciferol) did not differ before and after treatment and were omitted from the Table for the sake of clarity.

| PATIENT ID                              | $\alpha$ -tocopherol | $\gamma$ -tocopherol | PATIENT ID                             | $\alpha$ -tocopherol | $\gamma$ -tocopherol |
|-----------------------------------------|----------------------|----------------------|----------------------------------------|----------------------|----------------------|
| TM - 105 SUBJ 101 EXPL SERUM B VISIT 1B | 8.909                | 0.498                | TM - 105 SUBJ 101 EXPL SERUM D VISIT 7 | 17.824               | 217.393              |
| TM - 105 SUBJ 102 EXPL SERUM D VISIT 1B | 6.419                | 0.640                | TM - 105 SUBJ 102 EXPL SERUM D VISIT 7 | 14.863               | 416.915              |
| TM - 105 SUBJ 103 EXPL SERUM A VISIT 1B | 6.978                | 0.529                | TM - 105 SUBJ 103 EXPL SERUM D VISIT 7 | 14.701               | 428.179              |
| TM - 105 SUBJ 104 EXPL SERUM A VISIT 1B | 7.314                | 0.297                | TM - 105 SUBJ 104 EXPL SERUM A VISIT 7 | 17.852               | 429.757              |
| TM - 105 SUBJ 105 EXPL SERUM B VISIT 1B | 8.283                | 0.593                | TM - 105 SUBJ 105 EXPL SERUM B VISIT 7 | 18.955               | 546.009              |
| TM - 105 SUBJ 106 EXPL SERUM A VISIT 1B | 6.137                | 0.410                | TM - 105 SUBJ 106 EXPL SERUM D VISIT 7 | 13.831               | 328.553              |
| TM - 105 SUBJ 107 EXPL SERUM A VISIT 1B | 6.053                | 0.672                | TM - 105 SUBJ 107 EXPL SERUM B VISIT 7 | 26.803               | 267.262              |
| TM - 105 SUBJ 108 EXPL SERUM B VISIT 1B | 3.504                | 0.400                | TM - 105 SUBJ 108 EXPL SERUM D VISIT 7 | 29.179               | 315.148              |
| TM - 105 SUBJ 109 EXPL SERUM A VISIT 1B | 5.459                | 0.600                | TM - 105 SUBJ 109 EXPL SERUM A VISIT 7 | 12.194               | 408.546              |
| TM - 105 SUBJ 110 EXPL SERUM A VISIT 1B | 8.528                | 0.417                | TM - 105 SUBJ 110 EXPL SERUM D VISIT 7 | 22.693               | 374.396              |
| TM - 105 SUBJ 111 EXPL SERUM A VISIT 1B | 13.223               | 0.438                | TM - 105 SUBJ 111 EXPL SERUM D VISIT 7 | 21.249               | 384.615              |
| TM - 105 SUBJ 112 EXPL SERUM A VISIT 1B | 23.568               | 0.268                | TM - 105 SUBJ 112 EXPL SERUM D VISIT 7 | 14.447               | 417.786              |
| TM - 105 SUBJ 113 EXPL SERUM B VISIT 1B | 17.150               | 0.700                | TM - 105 SUBJ 113 EXPL SERUM D VISIT 7 | 19.894               | 336.769              |
| Mean                                    | 9.348                | 0.497                | Mean                                   | 18.807               | 374.718              |
| S.D.                                    | 5.544                | 0.139                | S.D.                                   | 5.128                | 83.428               |
| Two-tailed t-test for paired samples    | 0.037                | 0.028                |                                        |                      |                      |

**Table S5.** Raw data reporting the circulating concentrations in serum of heathy controls of those metabolites affected by ILB treatment in patients with ALS. Values are expressed as  $\mu\text{mol/l}$  serum. Means and S.D. are indicated at the end of each column and marked in red.

| HEALTHY CONTROLS | URIC ACID | MDA   | NAA   | SUM OXYPURINES | NO2 + NO3 | CTR     | ALA     | ORN     | ORN/CTR | $\alpha$ -tocopherol | $\gamma$ -tocopherol |
|------------------|-----------|-------|-------|----------------|-----------|---------|---------|---------|---------|----------------------|----------------------|
| 1                | 281.680   | 0.026 | 0.077 | 286.180        | 26.360    | 25.215  | 468.360 | 58.240  | 2.310   | 22.480               | 0.498                |
| 2                | 193.380   | 0.018 | 0.013 | 198.630        | 42.940    | 14.640  | 340.080 | 64.747  | 4.423   | 25.660               | 1.291                |
| 3                | 178.800   | 0.026 | 0.054 | 188.750        | 29.740    | 14.040  | 199.800 | 32.427  | 2.310   | 17.810               | 1.009                |
| 4                | 227.080   | 0.080 | 0.080 | 233.420        | 15.980    | 20.670  | 321.480 | 102.400 | 4.954   | 31.020               | 1.480                |
| 5                | 280.530   | 0.024 | 0.043 | 285.950        | 33.020    | 15.925  | 357.840 | 100.213 | 6.333   | 19.590               | 1.288                |
| 6                | 350.900   | 0.028 | 0.021 | 362.660        | 33.770    | 20.370  | 396.880 | 91.200  | 4.477   | 24.550               | 1.233                |
| 7                | 276.900   | 0.014 | 0.027 | 282.210        | 17.890    | 19.875  | 366.720 | 63.387  | 3.491   | 16.900               | 1.080                |
| 8                | 348.890   | 0.054 | 0.024 | 357.360        | 45.520    | 21.960  | 417.120 | 86.827  | 3.954   | 33.310               | 0.980                |
| 9                | 246.410   | 0.029 | 0.067 | 252.580        | 35.720    | 21.765  | 292.440 | 88.240  | 4.514   | 19.150               | 1.350                |
| 10               | 309.330   | 0.009 | 0.032 | 319.710        | 35.200    | 22.095  | 272.760 | 64.653  | 2.899   | 18.490               | 1.280                |
| 11               | 250.720   | 0.078 | 0.054 | 258.480        | 33.710    | 25.000  | 431.640 | 157.893 | 6.316   | 24.450               | 0.749                |
| 12               | 345.110   | 0.080 | 0.028 | 348.620        | 30.090    | 19.875  | 289.220 | 67.520  | 3.397   | 22.240               | 0.980                |
| 13               | 359.940   | 0.011 | 0.094 | 370.360        | 48.830    | 19.600  | 227.760 | 138.187 | 7.077   | 27.090               | 1.560                |
| 14               | 301.060   | 0.009 | 0.049 | 309.400        | 31.650    | 23.445  | 311.520 | 81.120  | 3.460   | 25.370               | 1.330                |
| 15               | 380.900   | 0.020 | 0.016 | 389.170        | 35.680    | 19.980  | 340.240 | 36.880  | 1.846   | 27.760               | 1.490                |
| 16               | 269.700   | 0.038 | 0.016 | 265.530        | 14.680    | 15.000  | 314.400 | 125.153 | 8.344   | 28.110               | 1.640                |
| 17               | 292.360   | 0.033 | 0.058 | 300.510        | 32.860    | 19.875  | 440.400 | 131.893 | 6.636   | 29.420               | 1.310                |
| 18               | 182.050   | 0.056 | 0.016 | 186.680        | 269.120   | 81.320  | 4.418   |         |         | 22.550               | 0.940                |
| 19               | 317.640   | 0.004 | 0.035 | 326.415        | 38.660    | 23.445  | 344.760 | 84.327  | 3.597   | 20.760               | 1.460                |
| 20               | 320.470   | 0.035 | 0.015 | 328.890        | 18.990    | 19.980  | 470.000 | 63.467  | 3.275   | 16.560               | 0.770                |
| 21               | 181.010   | 0.019 | 0.055 | 186.520        | 17.860    | 12.640  | 368.800 | 100.453 | 4.435   | 7.120                | 0.920                |
| 22               | 307.040   | 0.038 | 0.051 | 313.930        | 39.800    | 23.235  | 273.840 | 94.907  | 4.085   | 20.520               | 0.800                |
| 23               | 291.560   | 0.037 | 0.040 | 295.640        | 20.870    | 22.350  | 301.170 | 97.400  | 4.358   | 30.120               | 1.030                |
| 24               | 239.170   | 0.060 | 0.025 | 243.240        | 34.470    | 15.435  | 495.960 | 43.687  | 2.830   | 24.240               | 1.100                |
| 25               | 276.890   | 0.006 | 0.021 | 287.400        | 22.950    | 16.000  | 438.960 | 52.160  | 3.260   | 24.600               | 0.720                |
| 26               | 331.970   | 0.047 | 0.045 | 339.390        | 47.490    | 23.040  | 356.440 | 44.693  | 1.940   | 27.520               | 0.690                |
| 27               | 267.030   | 0.033 | 0.106 | 271.115        | 16.000    | 495.120 | 66.417  | 3.528   | 17.680  | 1.840                | 0.841                |
| 28               | 297.960   | 0.011 | 0.041 | 304.400        | 20.610    | 15.330  | 366.600 | 116.800 | 7.619   | 21.720               | 0.960                |
| 29               | 336.400   | 0.032 | 0.026 | 344.490        | 32.890    | 28.875  | 489.320 | 43.327  | 1.500   | 26.160               | 1.130                |
| 30               | 224.000   | 0.099 | 0.235 | 233.030        | 12.690    | 12.990  | 392.520 | 79.000  | 4.246   | 13.200               | 1.400                |
| 31               | 173.780   | 0.023 | 0.070 | 187.020        | 52.990    | 20.175  | 428.400 | 80.447  | 3.987   | 29.880               | 0.950                |
| 32               | 182.410   | 0.002 | 0.079 | 195.340        | 49.230    | 19.380  | 459.000 | 63.467  | 3.275   | 24.240               | 1.280                |
| 33               | 366.420   | 0.060 | 0.017 | 378.620        | 62.560    | 19.185  | 390.080 | 48.653  | 2.536   | 26.600               | 0.960                |
| 34               | 300.360   | 0.052 | 0.043 | 305.100        | 36.870    | 12.765  | 268.760 | 58.947  | 4.481   | 23.200               | 1.510                |
| 35               | 175.360   | 0.033 | 0.023 | 186.840        | 26.980    | 12.000  | 377.160 | 49.553  | 4.129   | 24.360               | 0.910                |
| 36               | 288.660   | 0.106 | 0.014 | 293.810        | 20.920    | 17.700  | 324.360 | 135.907 | 7.678   | 23.280               | 0.870                |
| 37               | 334.490   | 0.023 | 0.042 | 343.510        | 33.250    | 21.960  | 384.360 | 66.280  | 3.018   | 30.000               | 1.250                |
| 38               | 324.020   | 0.080 | 0.160 | 332.400        | 12.240    | 14.445  | 397.400 | 28.340  | 1.963   | 21.680               | 0.943                |
| 39               | 259.230   | 0.020 | 0.014 | 276.720        | 15.180    | 25.515  | 393.000 | 62.227  | 3.658   | 24.960               | 1.080                |
| 40               | 231.190   | 0.019 | 0.018 | 239.120        | 26.360    | 26.265  | 433.080 | 111.487 | 4.245   | 27.240               | 1.190                |
| 41               | 239.650   | 0.056 | 0.138 | 252.580        | 337.100   | 212.760 | 248.040 | 41.720  | 1.961   | 29.770               | 1.320                |
| 42               | 365.280   | 0.013 | 0.021 | 371.160        | 26.370    | 21.960  | 466.080 | 112.113 | 5.105   | 29.520               | 1.750                |
| 43               | 382.430   | 0.038 | 0.011 | 403.440        | 15.520    | 15.330  | 480.480 | 88.247  | 5.756   | 29.640               | 1.570                |
| 44               | 285.020   | 0.056 | 0.022 | 303.880        | 17.660    | 15.330  | 523.200 | 71.680  | 4.493   | 25.200               | 1.200                |
| 45               | 251.340   | 0.012 | 0.009 | 257.430        | 13.910    | 12.060  | 342.360 | 72.673  | 6.026   | 28.680               | 1.020                |
| 46               | 265.660   | 0.021 | 0.007 | 275.620        | 26.830    | 16.040  | 443.160 | 113.013 | 7.046   | 25.440               | 0.880                |
| 47               | 265.660   | 0.046 | 0.014 | 278.130        | 19.170    | 22.655  | 291.600 | 16.000  | 4.278   | 24.440               | 0.950                |
| 48               | 184.830   | 0.009 | 0.019 | 190.990        | 27.700    | 19.050  | 350.520 | 118.800 | 6.236   | 28.800               | 0.790                |
| 49               | 365.700   | 0.012 | 0.010 | 373.000        | 24.600    | 16.090  | 259.320 | 110.400 | 5.907   | 32.880               | 1.110                |
| 50               | 268.660   | 0.043 | 0.002 | 275.910        | 27.790    | 23.225  | 269.520 | 87.520  | 3.794   | 26.120               | 1.240                |
| 51               | 364.330   | 0.050 | 0.014 | 373.540        | 26.790    | 14.040  | 372.720 | 129.280 | 9.208   | 24.360               | 0.910                |
| 52               | 222.440   | 0.047 | 0.008 | 227.440        | 37.200    | 19.312  | 256.480 | 114.193 | 5.913   | 30.360               | 0.910                |
| 53               | 336.620   | 0.034 | 0.013 | 339.960        | 32.180    | 16.680  | 299.480 | 73.687  | 4.432   | 27.600               | 1.460                |
| 54               | 386.460   | 0.004 | 0.013 | 392.470        | 25.190    | 20.637  | 266.436 | 105.107 | 5.093   | 28.800               | 0.740                |
| 55               | 170.510   | 0.027 | 0.008 | 175.330        | 29.620    | 18.513  | 289.680 | 21.013  | 1.135   | 21.680               | 0.880                |
| 56               | 289.010   | 0.037 | 0.034 | 293.810        | 30.980    | 14.795  | 268.720 | 63.653  | 6.091   | 23.160               | 0.960                |
| 57               | 278.840   | 0.007 | 0.012 | 285.670        | 26.920    | 18.440  | 248.160 | 101.440 | 5.501   | 23.280               | 1.150                |
| 58               | 257.460   | 0.008 | 0.012 | 262.720        | 29.590    | 19.529  | 397.760 | 123.413 | 6.919   | 25.520               | 0.920                |
| 59               | 136.110   | 0.036 | 0.009 | 141.470        | 19.990    | 17.770  | 377.120 | 85.600  | 4.660   | 26.670               | 0.675                |
| 60               | 320.560   | 0.026 | 0.012 | 328.830        | 37.520    | 18.077  | 517.120 | 129.093 | 7.141   | 27.820               | 1.320                |
| 61               | 181.010   | 0.049 | 0.016 | 186.420        | 242.810   | 142.800 | 187.887 | 4.611   |         | 27.460               | 0.640                |
| 62               | 224.710   | 0.031 | 0.023 | 239.790        | 27.210    | 15.173  | 332.100 | 92.240  | 6.079   | 30.360               | 1.130                |
| 63               | 365.090   | 0.047 | 0.010 | 373.600        | 30.230    | 11.616  | 322.720 | 53.831  | 4.634   | 18.840               | 1.740                |
| 64               | 293.110   | 0.031 | 0.044 | 299.000        | 34.570    | 17.465  | 264.480 | 112.607 | 5.640   | 25.120               | 0.960                |
| 65               | 169.690   | 0.009 | 0.032 | 171.770        | 29.030    | 14.956  | 451.100 | 78.720  | 5.264   | 17.880               | 0.920                |
| 66               | 325.000   | 0.015 | 0.018 | 335.970        | 42.880    | 24.600  | 375.160 | 147.733 | 6.005   | 18.120               | 0.780                |
| 67               | 291.010   | 0.013 | 0.033 | 304.940        | 13.840    | 18.117  | 348.640 | 55.240  | 2.186   | 26.160               | 1.030                |
| 68               | 406.440   | 0.034 | 0.022 | 415.430        | 38.800    | 15.972  | 296.960 | 134.713 | 8.434   | 18.240               | 1.120                |
| 69               | 238.230   | 0.019 | 0.017 | 243.420        | 18.250    | 16.214  | 554.240 | 105.767 | 6.523   | 28.800               | 0.720                |
| 70               | 221.880   | 0.064 | 0.018 | 231.190        | 23.820    | 20.370  | 300.320 | 71.547  | 3.478   | 23.680               | 0.980                |
| 71               | 296.400   | 0.033 | 0.016 | 305.390        | 30.620    | 18.513  | 285.400 | 78.973  | 4.266   | 22.320               | 0.830                |
| 72               | 332.710   | 0.045 | 0.018 | 344.960        | 35.540    | 14.933  | 470.480 | 104.513 | 8.533   | 33.240               | 0.960                |
| 73               | 237.210   | 0.014 | 0.018 | 243.740        | 28.840    | 20.655  | 302.480 | 47.273  | 1.877   | 22.440               | 1.130                |
| 74               | 289.290   | 0.030 | 0.017 | 294.440        | 27.590    | 17.206  | 431.120 | 51.273  | 2.980   | 25.540               | 1.400                |
| 75               | 339.330   | 0.029 | 0.015 | 342.830        | 33.160    | 14.665  | 589.520 | 89.753  | 4.778   | 37.470               | 0.950                |
| 76               | 275.860   | 0.027 | 0.017 | 279.100        | 22.920    | 22.088  | 361.040 | 84.973  | 3.772   | 27.680               | 0.940                |
| 77               | 207.450   | 0.039 | 0.029 | 216.190        | 24.140    | 16.625  | 406.000 | 103.987 | 6.201   | 25.960               | 0.990                |
| 78               | 307.280   | 0.018 | 0.017 | 316.170        | 17.890    | 20.618  | 476.160 | 139.287 | 6.955   | 26.910               | 1.510                |
| 79               | 382.640   | 0.089 | 0.018 | 388.580        | 21.440    | 17.061  | 502.880 | 78.847  | 4.521   | 29.910               | 1.010                |
| 80               | 254.440   | 0.077 | 0.028 | 261.320        | 27.940    | 16.408  | 449.600 | 90.733  | 5.530   | 29.450               | 0.870                |
| 81               | 261.620   | 0.075 | 0.026 | 269.230        | 13.960    | 16.420  | 395.600 | 175.000 | 9.223   | 27.820               | 1.260                |
| 82               | 268.260   | 0.125 | 0.017 | 271.105        | 23.180    | 19.965  | 203.272 | 126.453 | 6.334   | 29.360               | 1.130                |
| 83               | 289.760   | 0.103 | 0.018 | 295.720        | 24.440    | 16.916  | 388.264 | 87.133  | 5.151   | 29.900               | 1.080                |
| 84               | 252.790   | 0.111 | 0.016 | 262.140        | 20.760    | 20.643  | 295.096 | 152.673 | 5.991   | 21.610               | 1.190                |
| 85               | 301.240   | 0.093 | 0.030 | 304.950        | 45.640    | 18.005  | 408.356 | 103.440 | 5.745   | 28.790               | 1.330                |
| 86               | 257.320   | 0.133 | 0.015 | 262.600        | 88.850    | 21.199  | 484.856 | 131.200 | 6.189   | 29.890               | 1.760                |
| 87               | 274.670   | 0.151 | 0.019 | 283.100        | 34.300    | 13.034  | 555.420 | 79.453  | 5.887   | 28.800               | 1.030                |
| 88               | 306.620   | 0.088 | 0.013 | 312.740        | 26.340    | 24.810  | 429.054 | 113.920 | 4.592   | 17.070               | 0.790                |
| 89               | 291.870   | 0.101 | 0.019 | 296.180        | 33.870    | 20.869  | 333.640 | 109.547 | 5.252   | 27.170               | 1.220                |
| 90               | 269.660   | 0.122 | 0.016 | 285.210        | 27.470    | 14.884  | 164.176 | 55.717  | 3.955   | 19.950               | 0.910                |
| 91               | 225.540   | 0.145 | 0.026 | 229.790        | 29.170    | 9.365   | 241.380 | 34.427  | 3.676   | 26.560               | 1.320                |
| 92               | 251.010   | 0.078 | 0.016 | 257.710        | 47.260    | 18.440  | 237.340 | 63.093  | 5.648   | 34.040               | 0.762                |
| 93               | 234.620   | 0.161 | 0.011 | 245.910        | 11.660    | 19.995  | 363.808 |         |         |                      |                      |
